# Supplementary material for: ASAP1 activates the IQGAP1/CDC42 pathway to promote tumor progression and chemotherapy resistance in gastric cancer
Source: PubMed Central journal article supplement (PMC9932153; doi:10.1038/s41419-023-05648-9), 2023-02-15
Supplement: 41419_2023_5648_MOESM1_ESM.pdf [file 41419_2023_5648_MOESM1_ESM.pdf]

**Important information. Please read.**

- This form should be used by authors to request any change in authorship (adding/deleting authors) including changes in corresponding authors. This form should not be used for name changes. Please fully complete all sections. Use black ink and block capitals and provide each author's full name with the given name first followed by the family name.
- By signing this declaration, all authors guarantee that the order of the authors are in accordance with their scientific contribution, if applicable as different conventions apply per discipline, and that only authors have been added who made a meaningful contribution to the work.
- Please note, in author collaborations where there is formal agreement for representing the collaboration, it is sufficient for the representative or legal guarantor (usually the corresponding author) to complete and sign the Authorship Change Form on behalf of all authors, next to the **added/removed author(s)**. (Complete Section 3, followed by Section 6.) In author collaborations where there is no formal agreement for representing the collaboration and **there are more than 10 authors**, one may sign for all, provided the signer appends correspondence that attests that each of the authors have agreed to the change and the **added/removed authors sign the form**. (Complete Section 3, followed by Section 6.)
- Please note, we cannot investigate or mediate any authorship disputes. If you are unable to obtain agreement from all authors (including those who you wish to be removed) you must refer the matter to your institution(s) for investigation. Please inform us if you need to do this.
- If you are not able to return a fully completed form within **30 days** of the date that it was sent to the author requesting the change, we may have to withdraw your manuscript. We cannot publish manuscripts where authorship has not been agreed by all authors (including those who have been removed).
- Incomplete forms will be rejected.
- Please return/upload this form, fully completed, to the Journals Editorial Office. The Journal and/or Publisher will consider the information you have provided to decide whether to approve the proposed change in authorship. We may decide to contact your institution for more information or undertake a further investigation, if appropriate, before making a final decision.

Section 1: Please provide the current title of manuscript

Manuscript ID no.: CDDIS-22-3331

Title: ASAP1 activates the IQGAPI/CDC42 pathway to promote tumor progression and chemotherapy resistance in gastric cancer

Section 2: Please provide the previous authorship, in the order shown on the manuscript before the changes were introduced. Please indicate the corresponding author by adding (CA) behind the name.

|                         | First name(s) | Family name | ORCID or SCOPUS id, if available |
|-------------------------|---------------|-------------|----------------------------------|
| 1 <sup>st</sup> author  | Wangkai       | Xie         |                                  |
| 2 <sup>nd</sup> author  | Zheng         | Han         |                                  |
| 3 <sup>rd</sup> author  | Ziyi          | Zuo         |                                  |
| 4 <sup>th</sup> author  | Hua           | Chen        |                                  |
| 5 <sup>th</sup> author  | Juanjuan      | Huang       |                                  |
| 6 <sup>th</sup> author  | Siyu          | Zhu         |                                  |
| 7 <sup>th</sup> author  | Han           | Lou         |                                  |
| 8 <sup>th</sup> author  | Zhiqiang      | Yu          |                                  |
| 9 <sup>th</sup> author  | Chenbin       | Chen        |                                  |
| 10 <sup>th</sup> author | Dong          | Xin         |                                  |
| 11 <sup>th</sup> author | Sian          | Chen        |                                  |
| 12 <sup>th</sup> author | Yuanbo        | Hu          |                                  |
| 13 <sup>th</sup> author | Jingjing      | Huang       |                                  |
| 14 <sup>th</sup> author | Fabiao        | Zhang       |                                  |
| 15 <sup>th</sup> author | Xian          | Shen        |                                  |
| 16 <sup>th</sup> author | Xiangyang     | Xue         |                                  |
| 17 <sup>th</sup> author | Kezhi         | Lin         |                                  |

Please use an additional sheet if there are more than 10 authors.

Section 3: Please provide a justification for change. Please use this section to explain your reasons for changing the authorship of your manuscript, e.g. what necessitated the change in authorship? Please refer to the (journal) policy pages for more information about authorship. Please explain why omitted authors were not originally included and/or why authors were removed on the submitted manuscript.

In the article revision stage, Dr Dong Xin made important contributions by completing the animal experiments and collating the data, he is the 10<sup>th</sup> author in previous authorship and is now applying to list him as a co-first author.

Dr. Zonglin Ni made important contributions in the revision stage of the article and now applies to list him as an author.

Section 4: Proposed new authorship. Please provide your new authorship list in the order you would like it to appear on the manuscript. Please indicate the corresponding author by adding (CA) behind the name. If the Corresponding Author has changed, please indicate the reason under section 3.

|                        | First name(s) | Family name (this name will appear in full on the final publication and will be searchable in various abstract and indexing databases) | Affiliated institute                                                                                                       | E-mail address      |
|------------------------|---------------|----------------------------------------------------------------------------------------------------------------------------------------|----------------------------------------------------------------------------------------------------------------------------|---------------------|
| 1 <sup>st</sup> author | Wangkai       | Xie                                                                                                                                    | Department of General Surgery, The Second Affiliated Hospital and Yuying Children's Hospital of Wenzhou Medical University | 757774124@qq.com    |
| 2 <sup>nd</sup> author | Zheng         | Han                                                                                                                                    | Department of General Surgery, The Second Affiliated Hospital and Yuying Children's Hospital of Wenzhou Medical University | hz_1213@qq.com      |
| 3 <sup>rd</sup> author | Ziyi          | Zuo                                                                                                                                    | Department of General Surgery, The First Affiliated Hospital of Wenzhou Medical University                                 | jerryzuo0214@msn.cn |
| 4 <sup>th</sup> author | Dong          | Xin                                                                                                                                    | Wenzhou Collaborative Innovation Center of Gastrointestinal Cancer in Basic Research and Precision Medicine                | 1063259676@qq.com   |
| 5 <sup>th</sup> author | Hua           | Chen                                                                                                                                   | Department of General Surgery, The First Affiliated Hospital of Wenzhou Medical University                                 | 1063259676@qq.com   |
| 6 <sup>th</sup> author | Juanjuan      | Huang                                                                                                                                  | Wenzhou Collaborative Innovation Center of Gastrointestinal Cancer in Basic Research and Precision Medicine                | 467565546@qq.com    |
| 7 <sup>th</sup> author | Siyu          | Zhu                                                                                                                                    | Wenzhou Collaborative Innovation Center of Gastrointestinal Cancer in Basic Research and Precision Medicine                | 958112364@qq.com    |
| 8 <sup>th</sup> author | Han           | Lou                                                                                                                                    | Wenzhou Collaborative Innovation Center of Gastrointestinal Cancer in Basic Research and Precision Medicine                | 624717107@qq.com    |

|                         | First name(s) | Family name (this name will appear in full on the final publication and will be searchable in various abstract and indexing databases) | Affiliated institute                                                                                                       | E-mail address      |
|-------------------------|---------------|----------------------------------------------------------------------------------------------------------------------------------------|----------------------------------------------------------------------------------------------------------------------------|---------------------|
| 9 <sup>th</sup> author  | Zhiqiang      | Yu                                                                                                                                     | Wenzhou Collaborative Innovation Center of Gastrointestinal Cancer in Basic Research and Precision Medicine                | 1169270810@qq.com   |
| 10 <sup>th</sup> author | Chenbin       | Chen                                                                                                                                   | Department of General Surgery, The Second Affiliated Hospital and Yuying Children's Hospital of Wenzhou Medical University | 1551156168@qq.com   |
| 11 <sup>th</sup> author | Sian          | Chen                                                                                                                                   | Department of emergency, The Second Affiliated Hospital and Yuying Children's Hospital of Wenzhou Medical University       | 136105041@qq.com    |
| 12 <sup>th</sup> author | Yuanbo        | Hu                                                                                                                                     | Department of General Surgery, The Second Affiliated Hospital and Yuying Children's Hospital of Wenzhou Medical University | 732267575@qq.com    |
| 13 <sup>th</sup> author | Jingjing      | Huang                                                                                                                                  | Department of Pathology, The Second Affiliated Hospital and Yuying Children's Hospital of Wenzhou Medical University       | maoer0923@163.com   |
| 14 <sup>th</sup> author | Fabiao        | Zhang                                                                                                                                  | Key Laboratory of Minimally Invasive Techniques & Rapid Rehabilitation of Digestive System Tumor of Zhejiang Province      | 784671568@qq.com    |
| 15 <sup>th</sup> author | Zonglin       | Ni                                                                                                                                     | Department of General Surgery, The Second Affiliated Hospital and Yuying Children's Hospital of Wenzhou Medical University | 17357571887@163.com |
| 16 <sup>th</sup> author | Xian          | Shen                                                                                                                                   | Department of General Surgery, The Second Affiliated Hospital and Yuying Children's Hospital of Wenzhou Medical University | 1396888872@163.com  |
| 17 <sup>th</sup> author | Xiangyang     | Xue                                                                                                                                    | Wenzhou Collaborative Innovation Center of Gastrointestinal Cancer in Basic Research and Precision Medicine                | wzxy001@163.com     |
| 18 <sup>th</sup> author | Kezhi         | Lin                                                                                                                                    | Wenzhou Collaborative Innovation Center of Gastrointestinal Cancer in Basic Research and Precision Medicine                | lkz@wmu.edu.cn      |

**Section 5: Author contribution, Acknowledgement and Disclosures.** Please use this section to provide a new disclosure statement and, if appropriate, acknowledge any contributors who have been removed as authors and ensure you state what contribution any new authors made (if applicable per the journal or book (series) policy). Please ensure these are updated in your manuscript - after approval of the change(s) - as our production department will not transfer the information in this form to your manuscript.

**New acknowledgements:**

We thank all patients who participated in this study and everyone who contributed to study.

**New Disclosures (financial and non-financial interests, funding):**

The authors declare that there is no conflict of interests.

This study was supported by grants from the National Natural Science Foundation of China (Grant Nos: 32070151), the Leading Talents in Scientific and Technological Innovation from Zhejiang Provincial Ten Thousand Talents Plan (Grant Nos: 2019R52021), and the Key R&D Program of Zhejiang Province (Grant Nos: 2020C03029, 2021C03120), the Zhejiang Provincial Natural Science Foundation of China (Grant No. LY19H190005)

**New Author Contributions statement (if applicable per the journal policy):**

Study conception and design, X.S., X.X., K.L.; experiment, W.X., Z.H., J.H., D.X., S.Z.; analyze bioinformatics data, Z.Z., H.C.; data collection, H.L., C.C., S.C., Y.H., H.J., F.Z., Z.N.; writing and original draft preparation, W.X

State 'Not applicable' if there are no new authors.

**Section 6: Declaration of agreement. All authors, unchanged, new and removed must sign this declaration.**

(NB: Please print the form, (docu)-sign and return/upload a scanned copy. Please note that signatures that have been inserted as an image file are acceptable as long as it is handwritten. Typed names in the signature box are unacceptable.) \* Please delete as appropriate. Delete all of the bold if you were on the original authorship list and are remaining as an author.

|                        | First name | Family name |                                                                                                                                                                         | Signature          | Date |
|------------------------|------------|-------------|-------------------------------------------------------------------------------------------------------------------------------------------------------------------------|--------------------|------|
| 1 <sup>st</sup> author | Wangkai    | Xie         | I agree to the proposed new authorship shown in section 4 /and the addition/removal* of my name to the authorship list /and the proposed change in corresponding author | 谢开 Xie Wangkai     |      |
| 2 <sup>nd</sup> author | Zheng      | Han         | I agree to the proposed new authorship shown in section 4 /and the addition/removal* of my name to the authorship list /and the proposed change in corresponding author | 韩 Zheng 郑政         |      |
| 3 <sup>rd</sup> author | Ziyi       | Zuo         | I agree to the proposed new authorship shown in section 4 /and the addition/removal* of my name to the authorship list /and the proposed change in corresponding author | 左 Ziyi Zuo         |      |
| 4 <sup>th</sup> author | Dong       | Xin         | I agree to the proposed new authorship shown in section 4 /and the addition/removal* of my name to the authorship list /and the proposed change in corresponding author | 董 Dong Xin         |      |
| 5 <sup>th</sup> author | Hua        | Chen        | I agree to the proposed new authorship shown in section 4 /and the addition/removal* of my name to the authorship list /and the proposed change in corresponding author | 陈 Hua 陈桦           |      |
| 6 <sup>th</sup> author | Juanjuan   | Huang       | I agree to the proposed new authorship shown in section 4 /and the addition/removal* of my name to the authorship list /and the proposed change in corresponding author | 黄娟娟 Juanjuan Huang |      |
| 7 <sup>th</sup> author | Siyu       | Zhu         | I agree to the proposed new authorship shown in section 4 /and the addition/removal* of my name to the authorship list /and the proposed change in corresponding author | 朱 Si Yu 朱思宇        |      |
| 8 <sup>th</sup> author | Han        | Lou         | I agree to the proposed new authorship shown in section 4 /and the addition/removal* of my name to the authorship list /and the proposed change in corresponding author | 韩 Han Lou          |      |
| 9 <sup>th</sup> author | Zhiqiang   | Yu          | I agree to the proposed new authorship shown in section 4 /and the addition/removal* of my name to the authorship list /and the proposed change in corresponding author | 俞 Zhiqiang 俞志强     |      |

|                         | First name | Family name |                                                                                                                                                                         | Signature          | Date |
|-------------------------|------------|-------------|-------------------------------------------------------------------------------------------------------------------------------------------------------------------------|--------------------|------|
| 10 <sup>th</sup> author | Chenbin    | Chen        | I agree to the proposed new authorship shown in section 4 /and the addition/removal* of my name to the authorship list /and the proposed change in corresponding author | 陈陈斌 Chen Chenbin   |      |
| 11 <sup>th</sup> author | Sian       | Chen        | I agree to the proposed new authorship shown in section 4 /and the addition/removal* of my name to the authorship list /and the proposed change in corresponding author | 陈斯彦 Chen Sian      |      |
| 12 <sup>th</sup> author | Yuanbo     | Hu          | I agree to the proposed new authorship shown in section 4 /and the addition/removal* of my name to the authorship list /and the proposed change in corresponding author | 胡渊博 Hu Yuanbo      |      |
| 13 <sup>th</sup> author | Jingjing   | Huang       | I agree to the proposed new authorship shown in section 4 /and the addition/removal* of my name to the authorship list /and the proposed change in corresponding author | 黄京京 Jingjing Huang |      |
| 14 <sup>th</sup> author | Fabiao     | Zhang       | I agree to the proposed new authorship shown in section 4 /and the addition/removal* of my name to the authorship list /and the proposed change in corresponding author | 张非凡 Fabiao Zhang   |      |
| 15 <sup>th</sup> author | Zonglin    | Ni          | I agree to the proposed new authorship shown in section 4 /and the addition/removal* of my name to the authorship list /and the proposed change in corresponding author | 倪宗林 Ni Zonglin     |      |
| 16 <sup>th</sup> author | Xian       | Shen        | I agree to the proposed new authorship shown in section 4 /and the addition/removal* of my name to the authorship list /and the proposed change in corresponding author | 沈贤 Xian Shen       |      |
| 17 <sup>th</sup> author | Xiangyang  | Xue         | I agree to the proposed new authorship shown in section 4 /and the addition/removal* of my name to the authorship list /and the proposed change in corresponding author | 薛向阳 Xiangyang Xue  |      |
| 18 <sup>th</sup> author | Kezhi      | Lin         | I agree to the proposed new authorship shown in section 4 /and the addition/removal* of my name to the authorship list /and the proposed change in corresponding author | 林柯志 Kezhi Lin      |      |

Please use an additional sheet if there are more than 10 authors.

In case of author collaborations with formal agreement:

|                                 | Name of consortium/ consortia | First name | Family name |                                                                                                                                                                         | Signature | Date |
|---------------------------------|-------------------------------|------------|-------------|-------------------------------------------------------------------------------------------------------------------------------------------------------------------------|-----------|------|
| Representative/ legal guarantor |                               |            |             | I agree to the proposed new authorship shown in section 4 /and the addition/removal* of my name to the authorship list /and the proposed change in corresponding author |           |      |

Both added/removed authors should complete the information in the first table under Section 6.

---- End of form ----
