# Supplementary material for: ASAP1 activates the IQGAP1/CDC42 pathway to promote tumor progression and chemotherapy resistance in gastric cancer
Source: PubMed Central journal article supplement (PMC9932153; doi:10.1038/s41419-023-05648-9), 2023-02-15
Supplement: 41419_2023_5648_MOESM12_ESM.pdf [file 41419_2023_5648_MOESM12_ESM.pdf]

Full and uncropped western blot for Figure3A

ASAP1

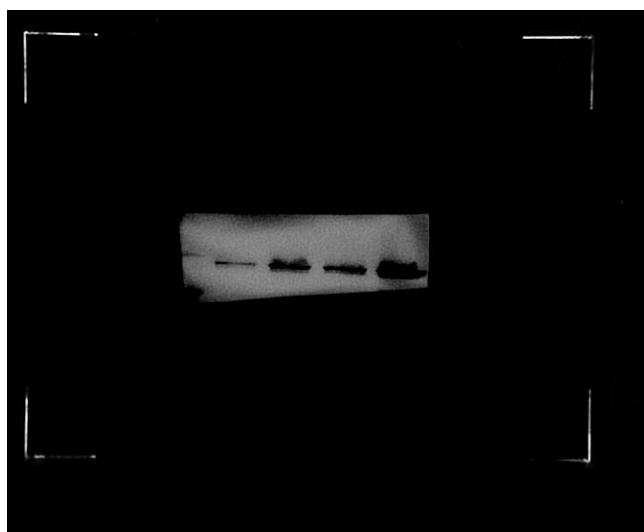

132kDa

HA

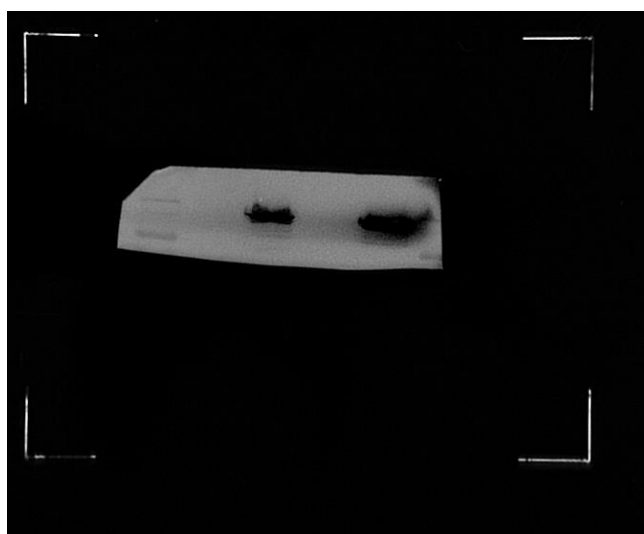

132kDa

GAPDH

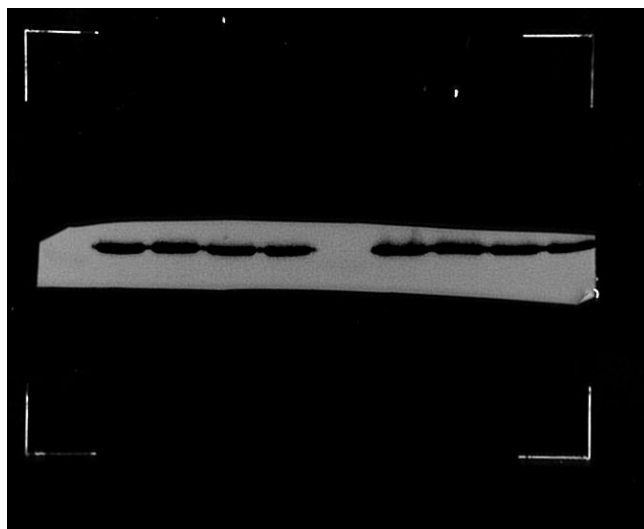

37kDa

Full and uncropped western blot for Figure3D

ASAP1

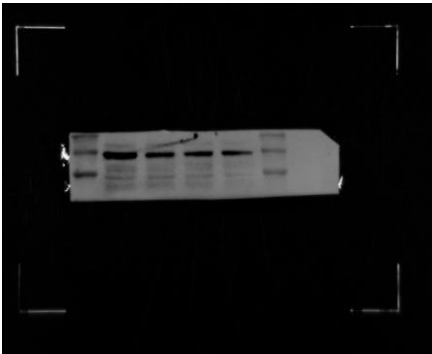

132kDa

GAPDH

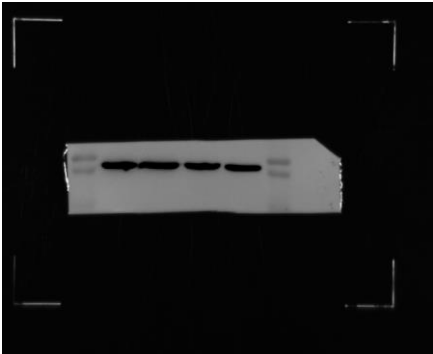

37kDa

ASAP1

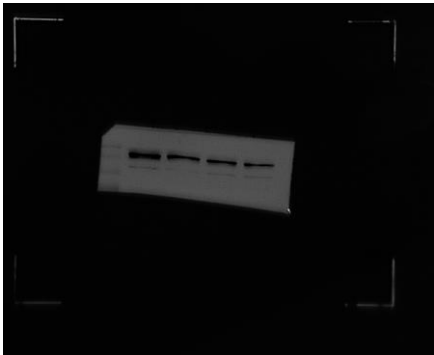

132kDa

GAPDH

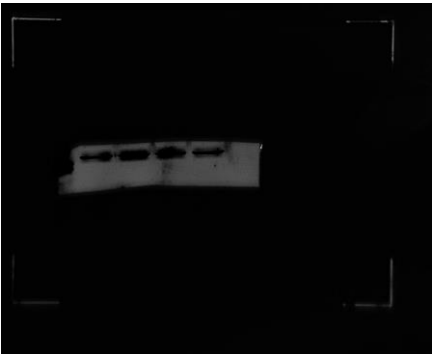

37kDa

Full and uncropped western blot for Figure3G

ASAP1

132kDa

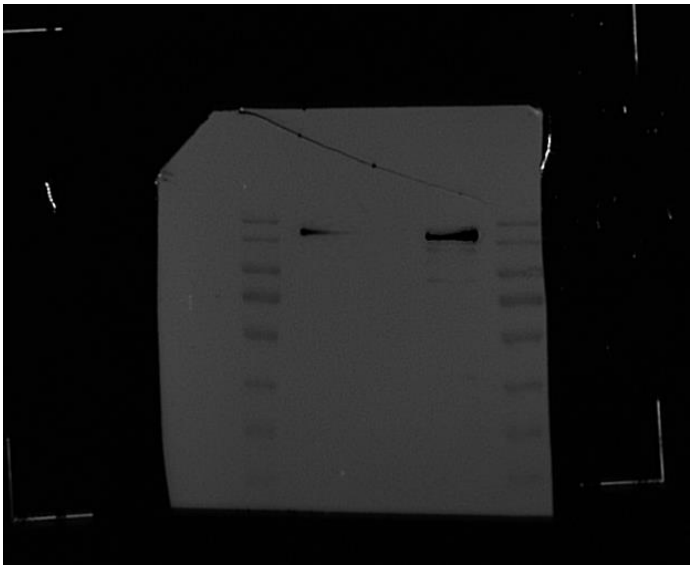

GAPDH

37kDa

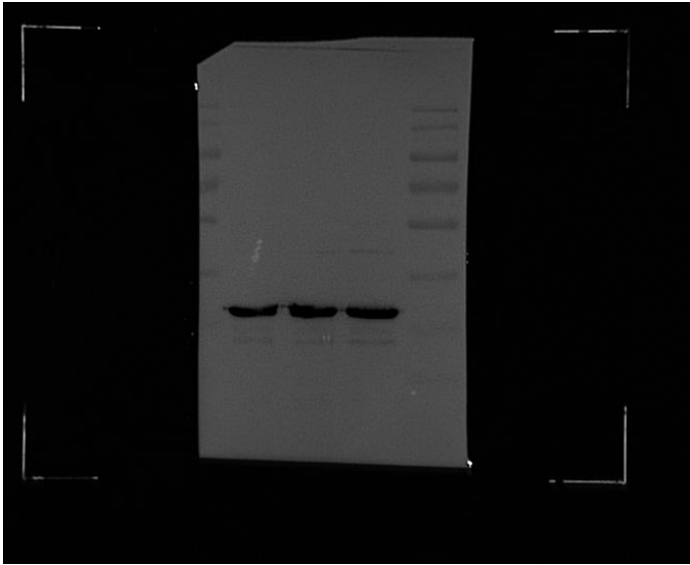

Full and uncropped western blot for Figure 5D

ASAP1

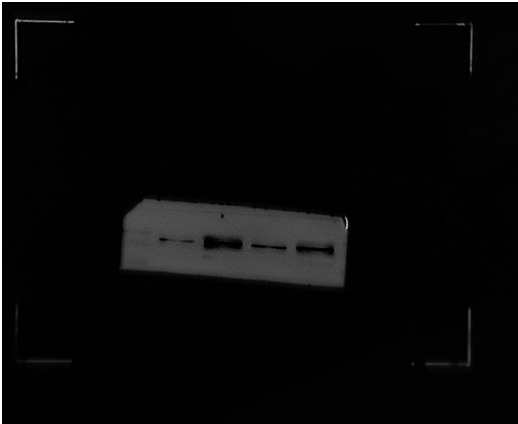

132kDa

CDC42

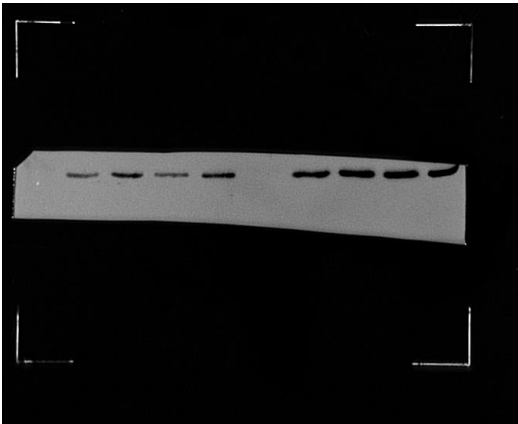

21kDa

GAPDH

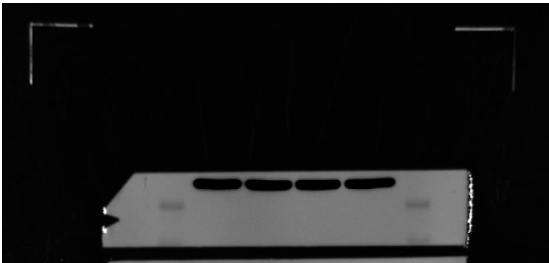

37kDa

Full and uncropped western blot for Figure6

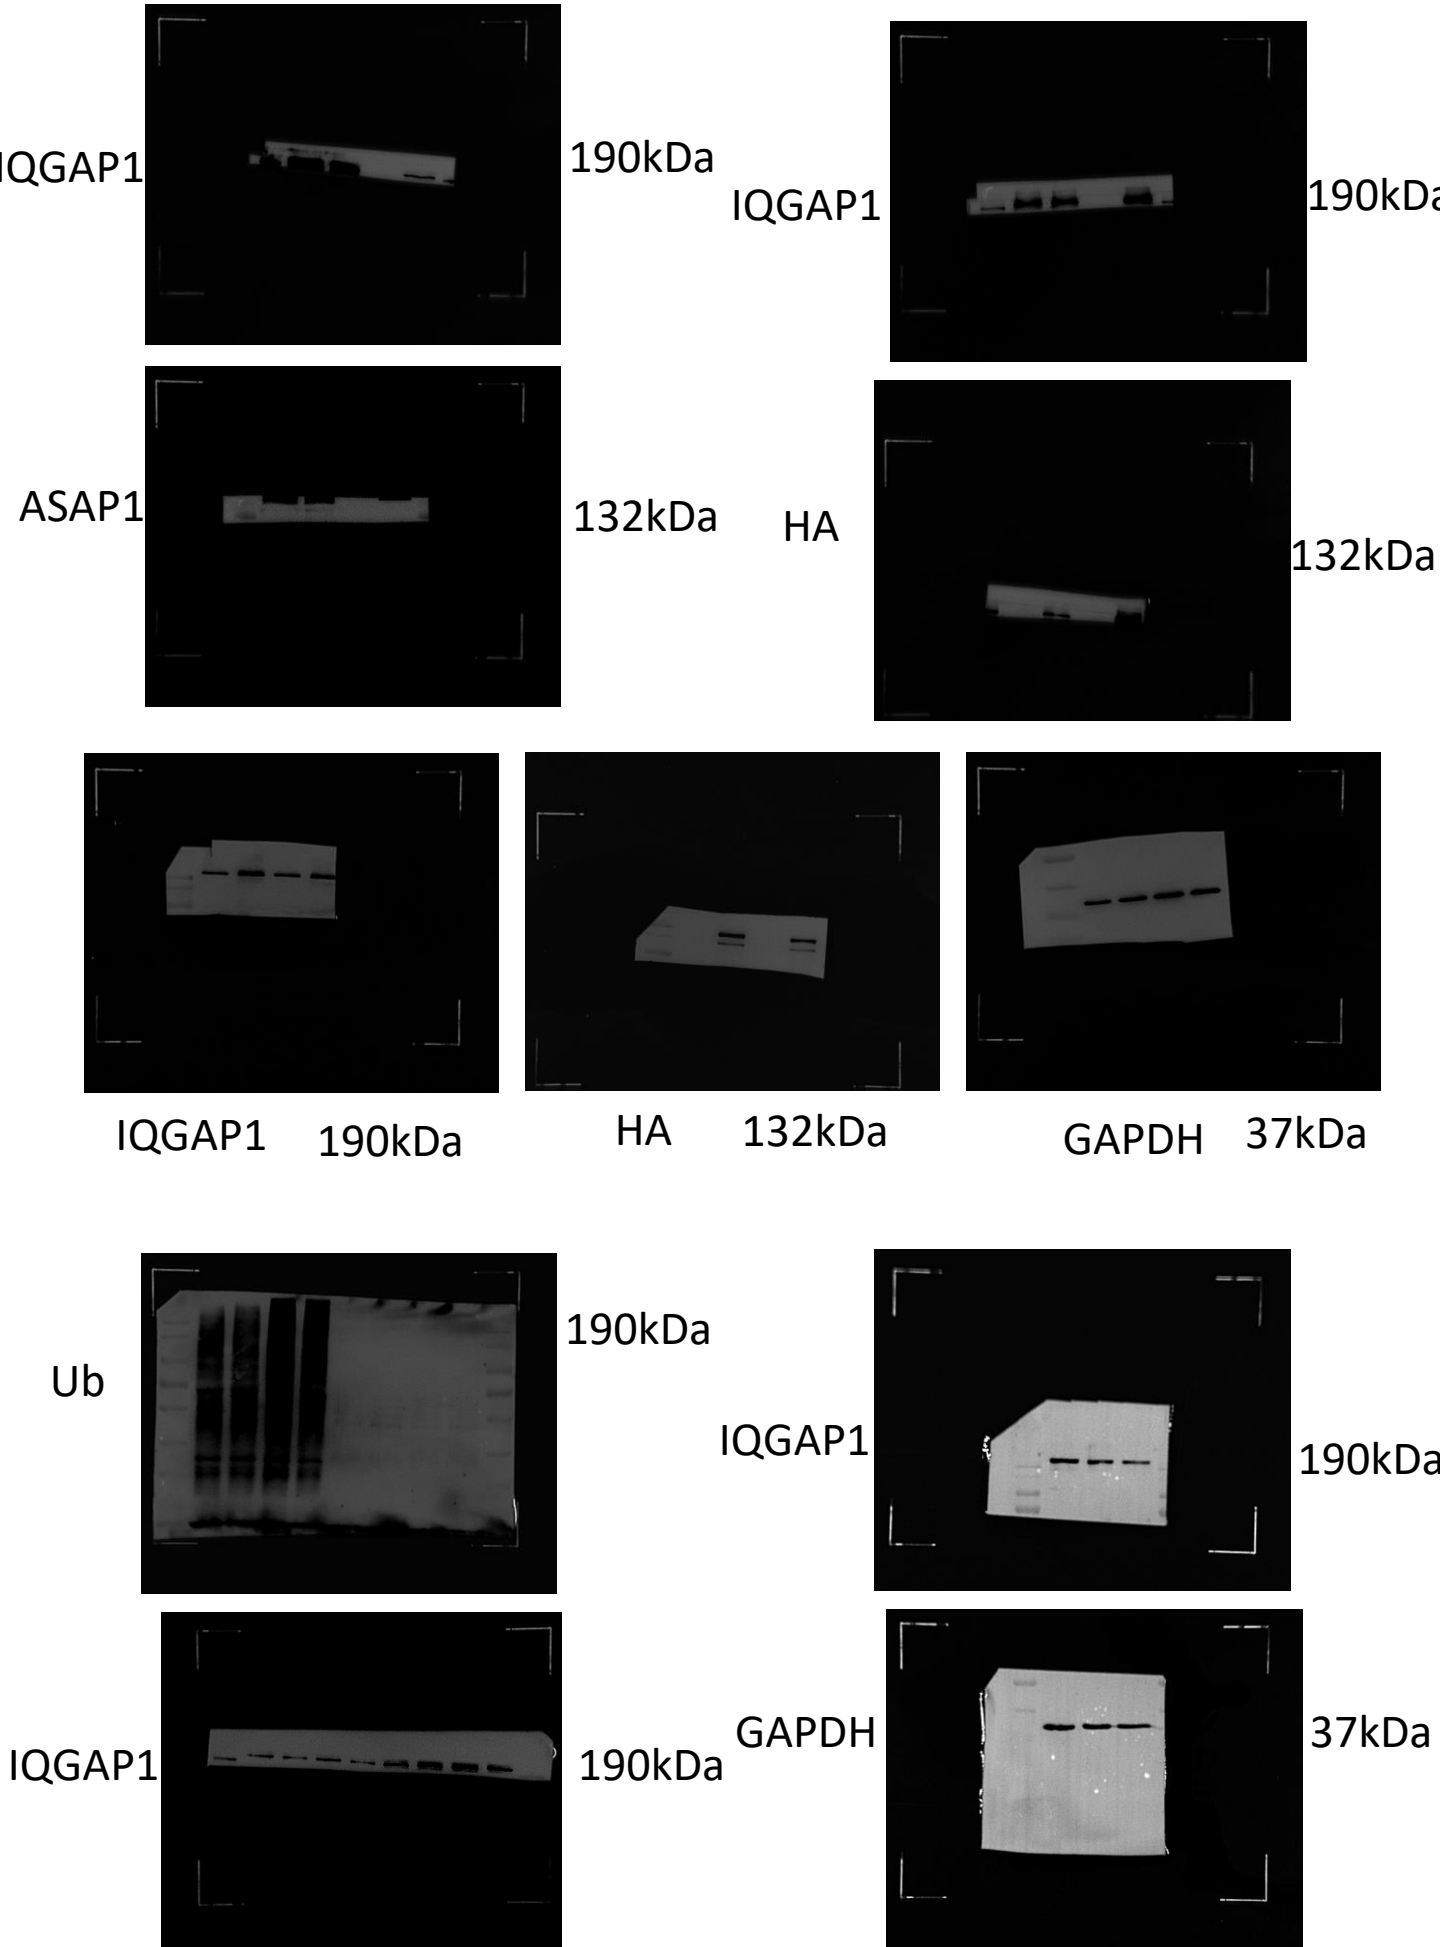

Full and uncropped western blot for Figure7

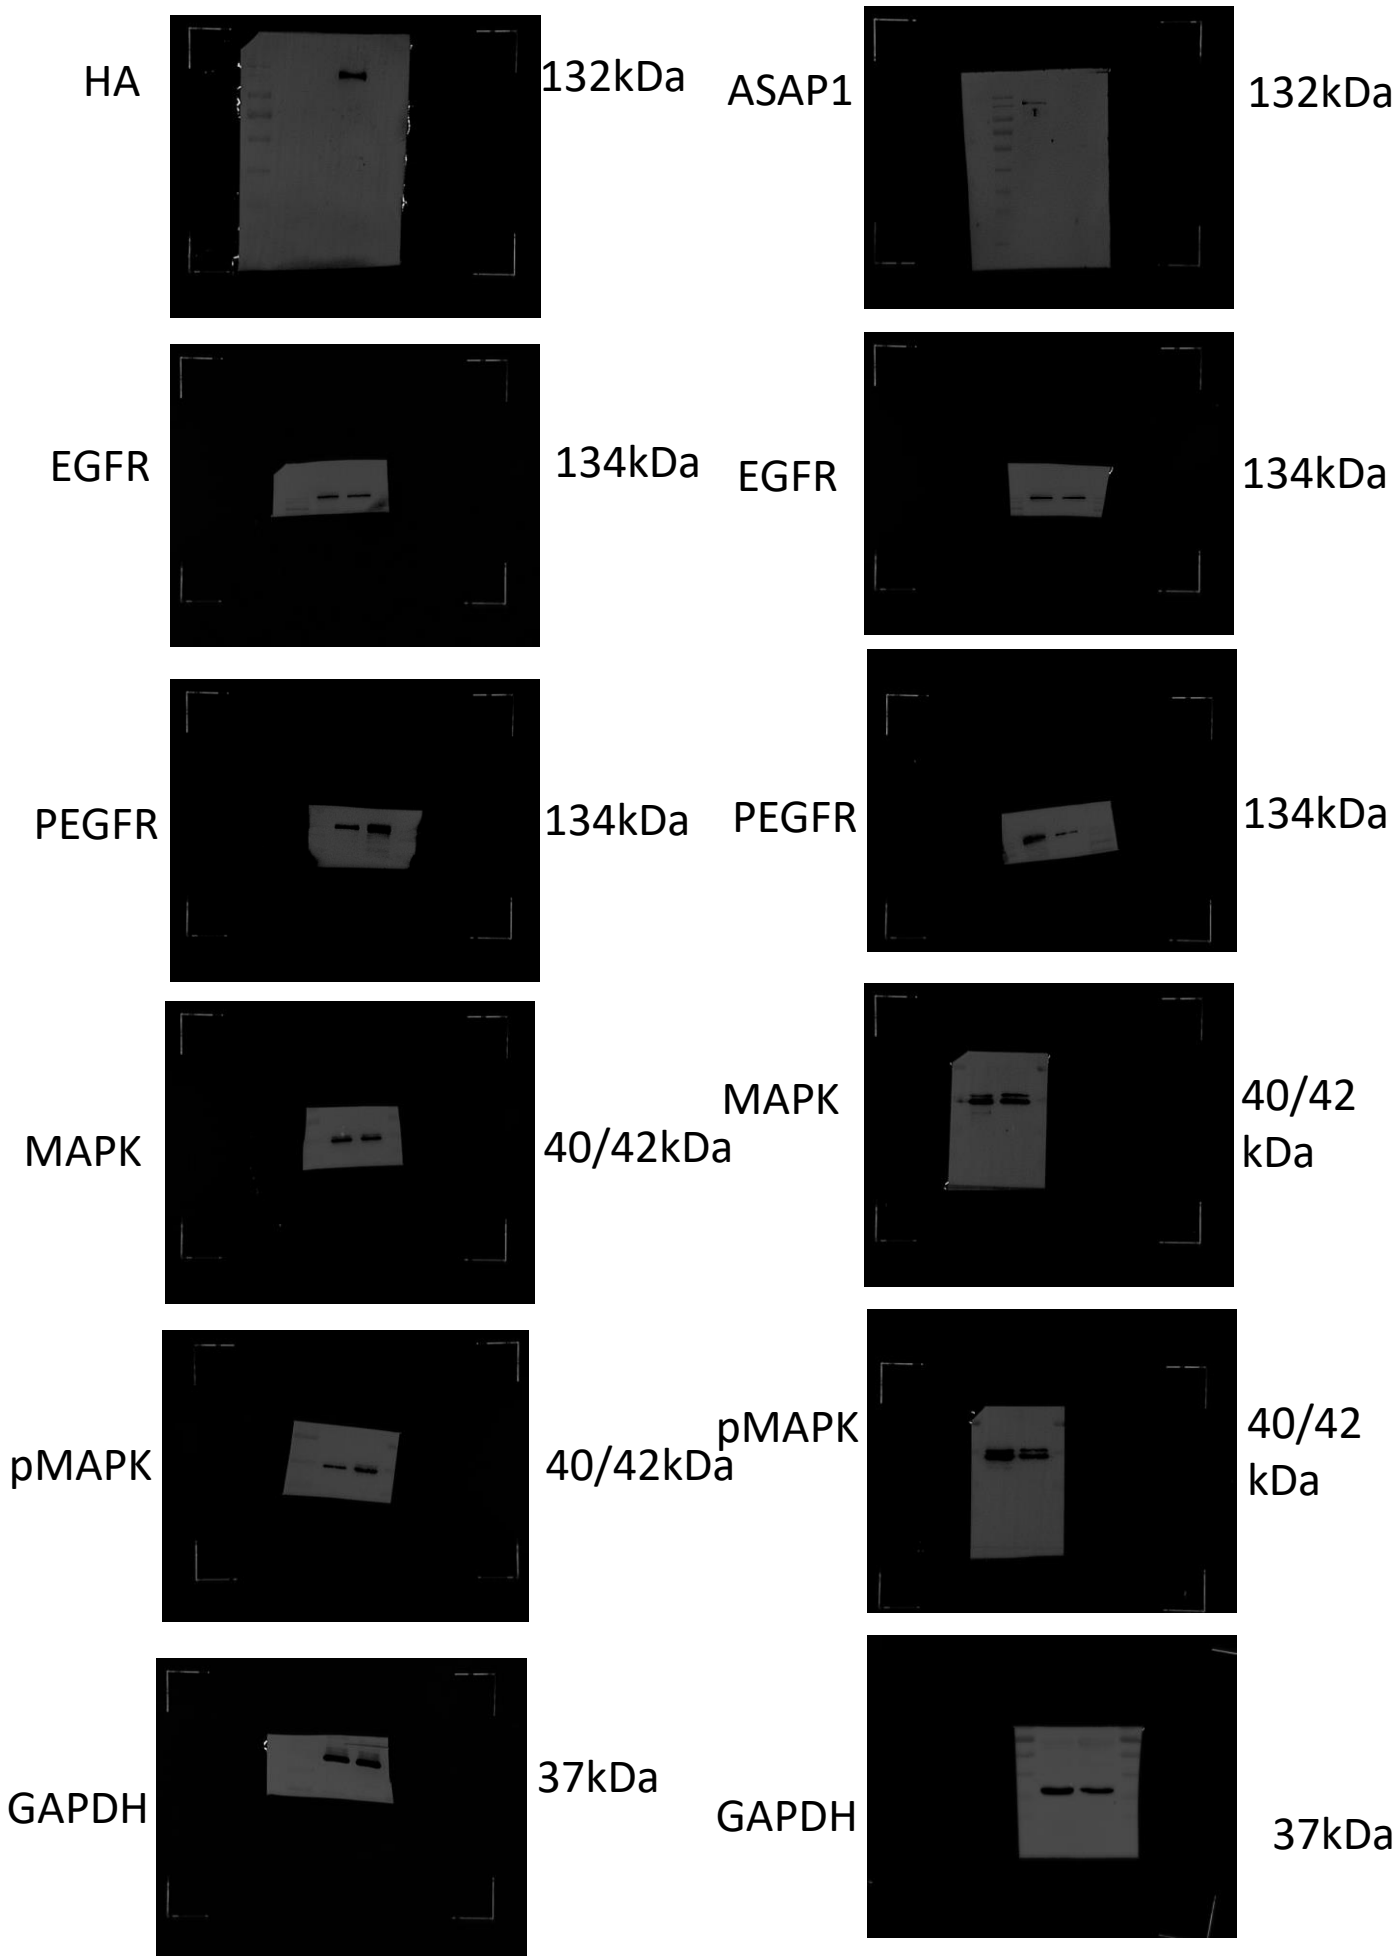

Full and uncropped western blot for FigureS3

ASAP1

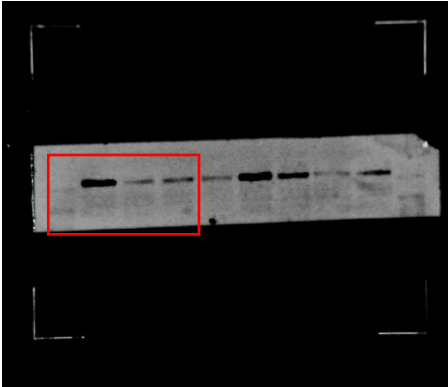

132kDa

Ecad

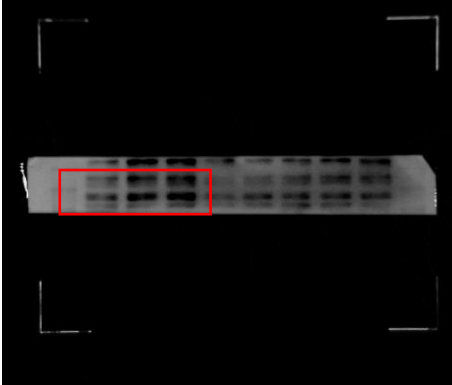

125kDa

Ncad

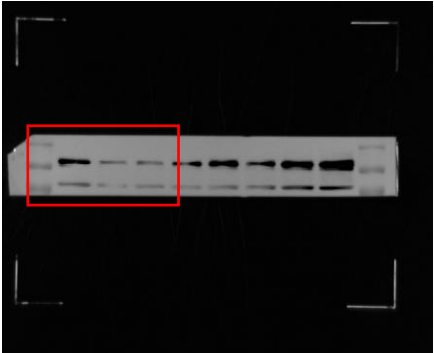

130kDa

GAPDH

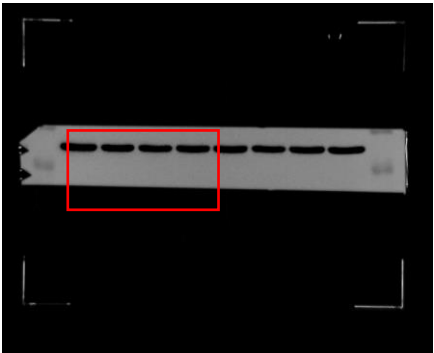

37kDa

Full and uncropped western blot for FigureS4

IQGAP1

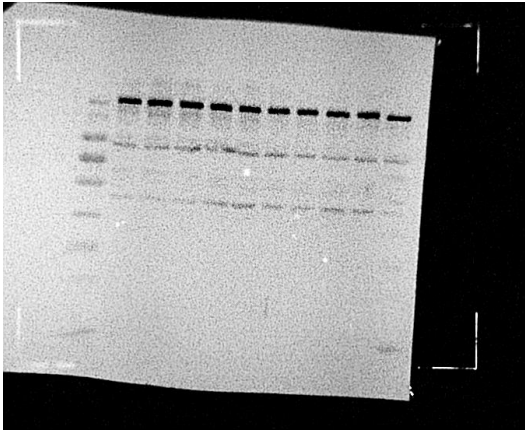

190kDa

GAPDH

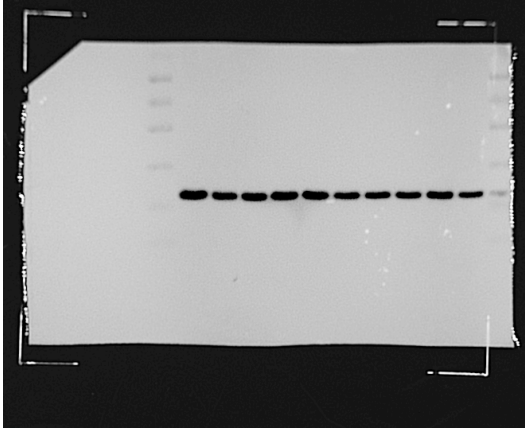

37kDa

ASAP1

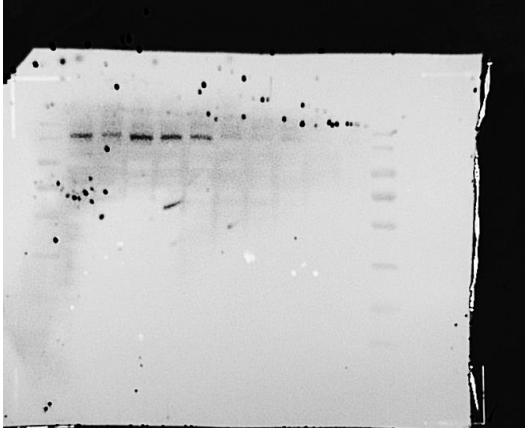

132kDa
